# Supplementary material
Source: publisher figshare collection journal article supplement (https://acs.figshare.com/ndownloader/files/5802477)

#### Terms & Conditions

Electronic Supporting Information files are available without a subscription to ACS Web Editions. The American Chemical Society holds a copyright ownership interest in any copyrightable Supporting Information. Files available from the ACS website may be downloaded for personal use only. Users are not otherwise permitted to reproduce, republish, redistribute, or sell any Supporting Information from the ACS website, either in whole or in part, in either machine-readable form or any other form without permission from the American Chemical Society. For permission to reproduce, republish and redistribute this material, requesters must process their own requests via the RightsLink permission system. Information about how to use the RightsLink permission system can be found at <http://pubs.acs.org/page/copyright/permissions.html>

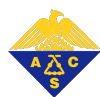

ACS Publications

MOST TRUSTED. MOST CITED. MOST READ.

Copyright © 1998 American Chemical Society

## Supporting Information

**5:** A mixture of the tosylate **4** (6.887 g, 14.57 mmol) and thiourea (1.221 g, 16.04 mmol) in 36 mL of 95% EtOH was heated at 90°C for 20 h. After the solvent was removed and dried in vacuo, the residue was mixed with a solution of KOH (6.140 g, 93.01 mmol) in 35 mL of H<sub>2</sub>O. The mixture was refluxed for 24 h under N<sub>2</sub>. After cooling, the reaction mixture was acidified with 20 mL of 12N H<sub>2</sub>SO<sub>4</sub> and extracted with CHCl<sub>3</sub> (50 mL x 3). The organic layer was dried over anhydrous MgSO<sub>4</sub> and then concentrated in vacuo. The crude product thus obtained was purified by silica gel column chromatography using CHCl<sub>3</sub>/AcOEt (20 : 1) as an eluent to afford **5** (3.611 g, 74%) as a colorless oil. <sup>13</sup>C NMR (100 MHz, CDCl<sub>3</sub>) δ (ppm) 14.15, 22.70, 24.28, 26.10, 29.36, 29.51, 29.63, 29.68, 31.93, 70.07, 70.25, 70.55, 70.70, 71.58, 72.89.

**6:** To a suspension of NaH (0.104 g, 2.383 mmol) in 2 mL of THF was added a solution of **5** (0.761 g, 2.275 mmol) in 2 mL of THF. After the mixture was stirred for a few minutes, ethyl 4-bromobutyrate (0.400 g, 2.05 mmol) in 2.5 mL of THF was added to the reaction mixture, which was stirred for 5 h at room temperature and then the solvent was removed under reduced pressure. The residue was mixed with 30 mL of H<sub>2</sub>O, extracted with CHCl<sub>3</sub> (30 mL x 5), and dried over anhydrous MgSO<sub>4</sub>, and then concentrated in vacuo. The crude product was purified by silica gel column chromatography using CH<sub>2</sub>Cl<sub>2</sub>/Et<sub>2</sub>O (20 : 1) as an eluent to afford **6** (0.775 g, 84%) as a pale yellow oil. <sup>13</sup>C NMR (100

MHz, CDCl<sub>3</sub>)  $\delta$  (ppm) 14.15, 14.24, 22.70, 24.81, 26.10, 29.37, 29.51, 29.63, 29.65, 29.68, 31.20, 31.73, 31.93, 33.01, 60.40, 70.06, 70.35, 70.59, 70.68, 70.93, 71.58, 173.11.

**7:** A solution of **6** (1.000 g, 2.229 mmol) in 11 mL of EtOH was treated with a solution of NaOH (0.462 g, 11.55 mmol) in 2 mL of H<sub>2</sub>O at 80~90°C for 2 h, and then the solvent was removed in vacuo. The residue was mixed with 30 mL of H<sub>2</sub>O and 5 mL of 3N HCl, extracted with CHCl<sub>3</sub> (30 mL x 3), and dried over anhydrous MgSO<sub>4</sub>, and then concentrated in vacuo. The crude product was used without purification, because <sup>1</sup>H NMR spectrum of the crude **7** indicates exclusive formation of **7**. <sup>13</sup>C NMR (100 MHz, CDCl<sub>3</sub>)  $\delta$  (ppm) 14.15, 22.70, 24.58, 26.06, 29.37, 29.49, 29.52, 29.62, 29.65, 29.68, 31.12, 31.53, 31.93, 32.64, 70.02, 70.35, 70.58, 70.61, 71.19, 71.59, 177.94.

**8:** To a solution of **7** (1.00 g, 2.38 mmol) in 40 mL of CH<sub>2</sub>Cl<sub>2</sub> and 0.4 mL of DMF was added oxalyl chloride (0.42 mL, 4.8 mmol) in one portion. The reaction mixture was heated at 50°C for 4 h. After evaporation of the solvent in vacuo, formation of **8** was ascertained by <sup>1</sup>H NMR ((200 MHz, CDCl<sub>3</sub>)  $\delta$  (ppm) 3.69-3.55 (m, 10H), 3.42 (t, 2H, J = 6.80 Hz), 3.02 (t, 2H, J = 7.08 Hz), 2.67 (t, 2H, J = 8.48 Hz), 2.60 (t, 2H, J = 6.96 Hz), 1.96 (m, 2H), 1.50 (m, 2H), 1.26 (s, 18H), 0.84(t, 3H)). A solution of the crude **8** (ca. 90% purity by <sup>1</sup>H NMR) solution in 15 mL of THF was added slowly to a mixture of 2,6-diaminopyridine (1.307 g, 11.98 mmol) and Et<sub>3</sub>N (0.65 mL, 4.689 mmol), and then the mixture was stirred for 3 h at room temperature. The solvent was removed in vacuo and the residue was mixed with 30 mL of H<sub>2</sub>O and extracted with CHCl<sub>3</sub> (30 mL x 3). The combined organic layers were dried over anhydrous MgSO<sub>4</sub> and concentrated in vacuo. The crude product was purified by

silica gel column chromatography using  $\text{CHCl}_3/\text{MeOH}$  (15 : 1) as an eluent to give **8** (1.01 g, 83%) as a pale yellow oil.  $^{13}\text{C}$  NMR (100 MHz,  $\text{CDCl}_3$ )  $\delta$  (ppm) 14.14, 22.69, 24.85, 26.07, 29.35, 29.20, 29.62, 29.67, 31.23, 31.72, 31.92, 35.93, 70.03, 70.31, 70.56, 70.63, 70.91, 71.56, 103.19, 104.23, 140.11, 149.71, 157.08, 170.67.

**1**: Amide **8** (2.40 g, 4.69 mmol) and  $\text{Et}_3\text{N}$  (0.97 mL, 7.0 mmol) were dissolved in THF (40 mL). Glutaryl chloride (0.40 mL, 3.1 mmol) was added dropwise to the mixture and it was stirred for 19 h at room temperature. After evaporation of the solvent, the residue was mixed with  $\text{H}_2\text{O}$  (40 mL) and extracted with  $\text{CHCl}_3$  (40 mL x 3). The organic layers were combined and dried over anhydrous  $\text{MgSO}_4$ . After concentration in vacuo, chromatography on  $\text{SiO}_2$  ( $\text{CHCl}_3$ -acetone = 3:1) gave **1** (1.98 g, 76%). M.p. 99.2-102.4°C (acetone);  $^{13}\text{C}$  NMR (100 MHz,  $\text{CDCl}_3$ )  $\delta$  (ppm) 14.15, 20.98, 22.69, 24.69, 26.08, 29.36, 29.50, 29.62, 29.64, 29.67, 31.26, 31.72, 31.92, 35.78, 36.05, 70.01, 70.30, 70.56, 70.62, 70.86, 71.57, 109.43, 109.56, 140.68, 149.35, 149.56, 171.07, 171.20; IR (KBr):  $\nu$  = 3306, 1671  $\text{cm}^{-1}$ ; FABMS:  $m/z$  = 1119 ( $[\text{M}]^+$ ); elemental analysis for  $\text{C}_{59}\text{H}_{102}\text{N}_6\text{O}_{10}\text{S}_2$ : calcd C 63.29, H 9.18, N 7.51; found C 63.00, H 9.30, N 7.42.

HOST

JEOL

15-MAR-1995 00:24:38.78

DFILE : ALPHA; 9  
SFILE : YY-TAKAHASHI-35-9COMNT : HOST  
EXMOD : SINGL  
IRMOD : NON  
POINT : 32768  
FREQU : 10000.00 Hz  
SCANS : 32  
DUMMY : 1  
ACQTM : 3.2768 sec  
PD : 4.3616 sec  
RGAIN : 23

PW1 : 6.00 usec

OBNUC : 1H  
OBFRQ : 500.00 MHz  
OBSET : 162410.00 HzIRNUC : 1H  
IRFRQ : 500.00 MHz  
IRSET : 162410.00 Hz  
IRATN : 511  
IRAPW : 50.0 usec  
IRBP1 : 27  
IRBP2 : 6  
IRANS : 0ADBIT : 16  
CTEMP : 24.0 c  
CSPED : 11 Hz  
SLVNT : C6D6RESOL : 0.31 Hz  
BF : 0.10 Hz  
T1 : 0.00 %  
T2 : 0.00 %  
T3 : 90.00 %  
T4 : 100.00 %  
REFVL : 0.00 ppm  
XE : 6551.82 Hz  
XS : -733.80 Hz  
operator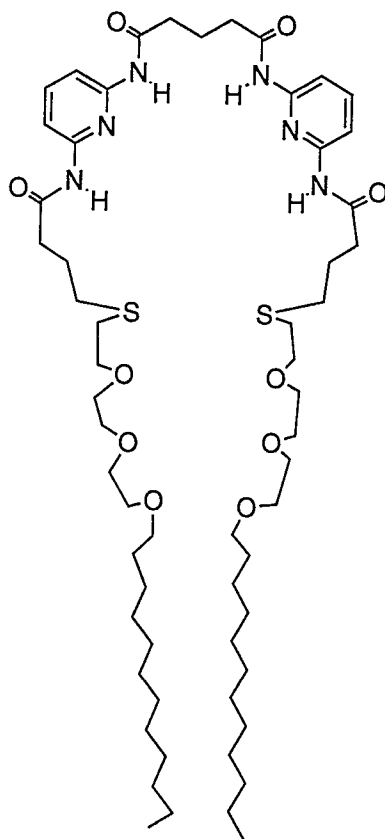

1

7.90  
7.707.26  
7.263.65  
3.64  
3.59  
3.46  
3.44  
3.43  
2.74  
2.72  
2.71  
2.67  
2.532.17  
2.02

1.97

1.25

0.89  
0.88  
0.860.07  
0.00  
0.00

ppm

12

10

8

6

4

2

0

1H-STANDARD

JEOL

21-NOV-1994 22: 19: 48.46

DFILE : ALPHA  
SFILE : YY-TAKAHASHI-28-10

COMNT : 1H-STANDARD  
EXMOD : SINGL  
IRMOD : NON  
POINT : 32768  
FREQU : 10000.00 Hz  
SCANS : 32  
DUMMY : 1  
ACQTM : 3.2768 sec  
PD : 4.3616 sec  
RGAIN : 23

PW1 : 6.00 usec

OBNUC : 1H  
OBFRQ : 500.00 MHz  
OBSET : 162410.00 Hz

IRNUC : 1H  
IRFRQ : 500.00 MHz  
IRSET : 162410.00 Hz  
IRATN : 511  
IRRPW : 50.0 usec  
IRBP1 : 27  
IRBP2 : 6  
IRANS : 0

ADBIT : 16  
CTEMP : 24.3 c  
CSPED : 11 Hz  
SLVNT : CDCL3

RESOL : 0.31 Hz  
BF : 0.10 Hz  
T1 : 0.00 %  
T2 : 0.00 %  
T3 : 90.00 %  
T4 : 100.00 %  
REFVL : 0.00 ppm  
XE : 7051.70 Hz  
XS : -984.65 Hz

operator

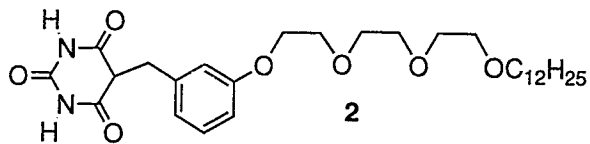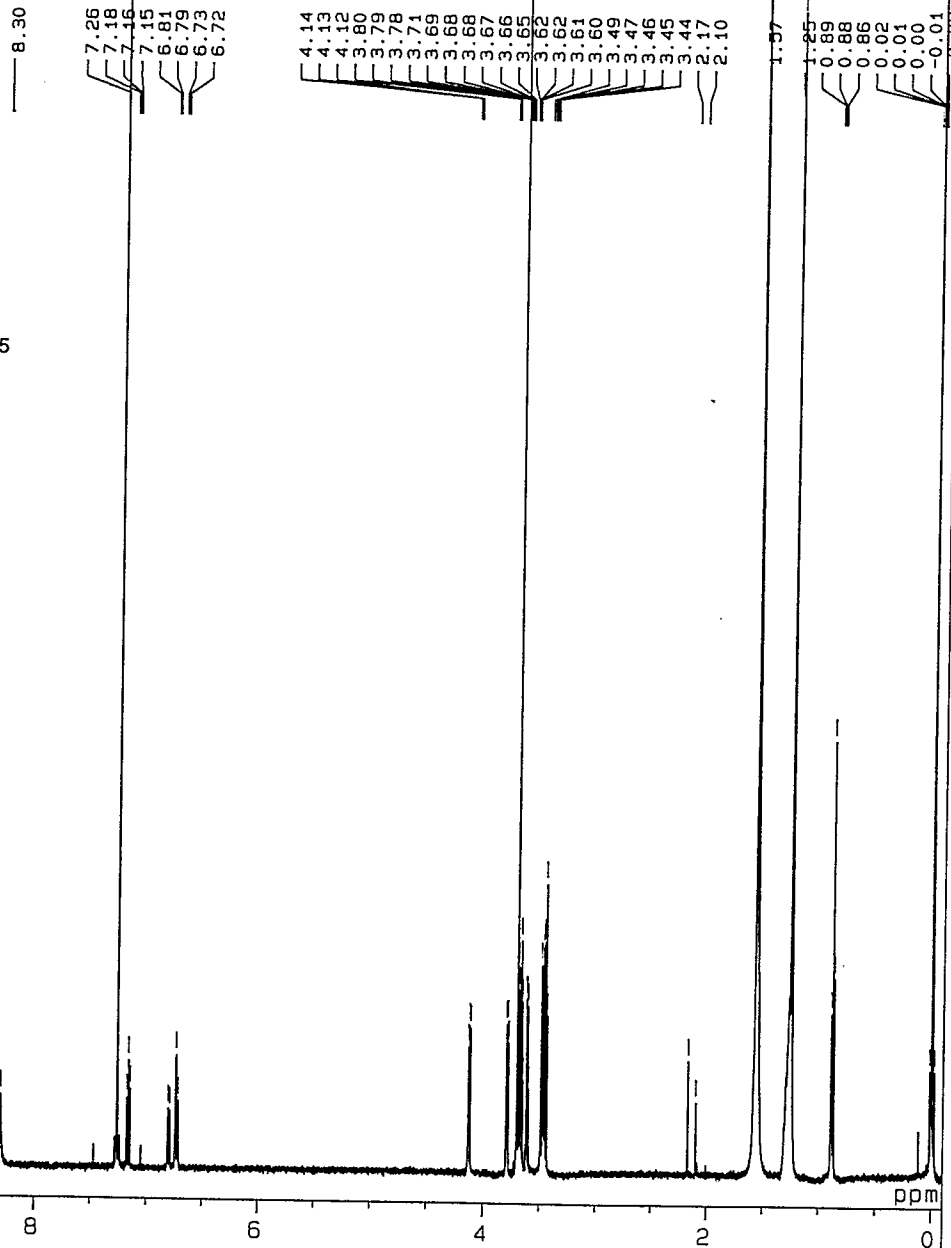

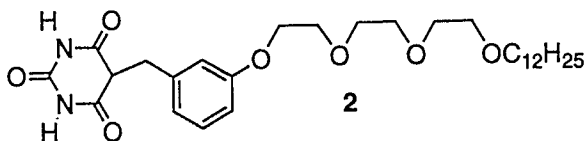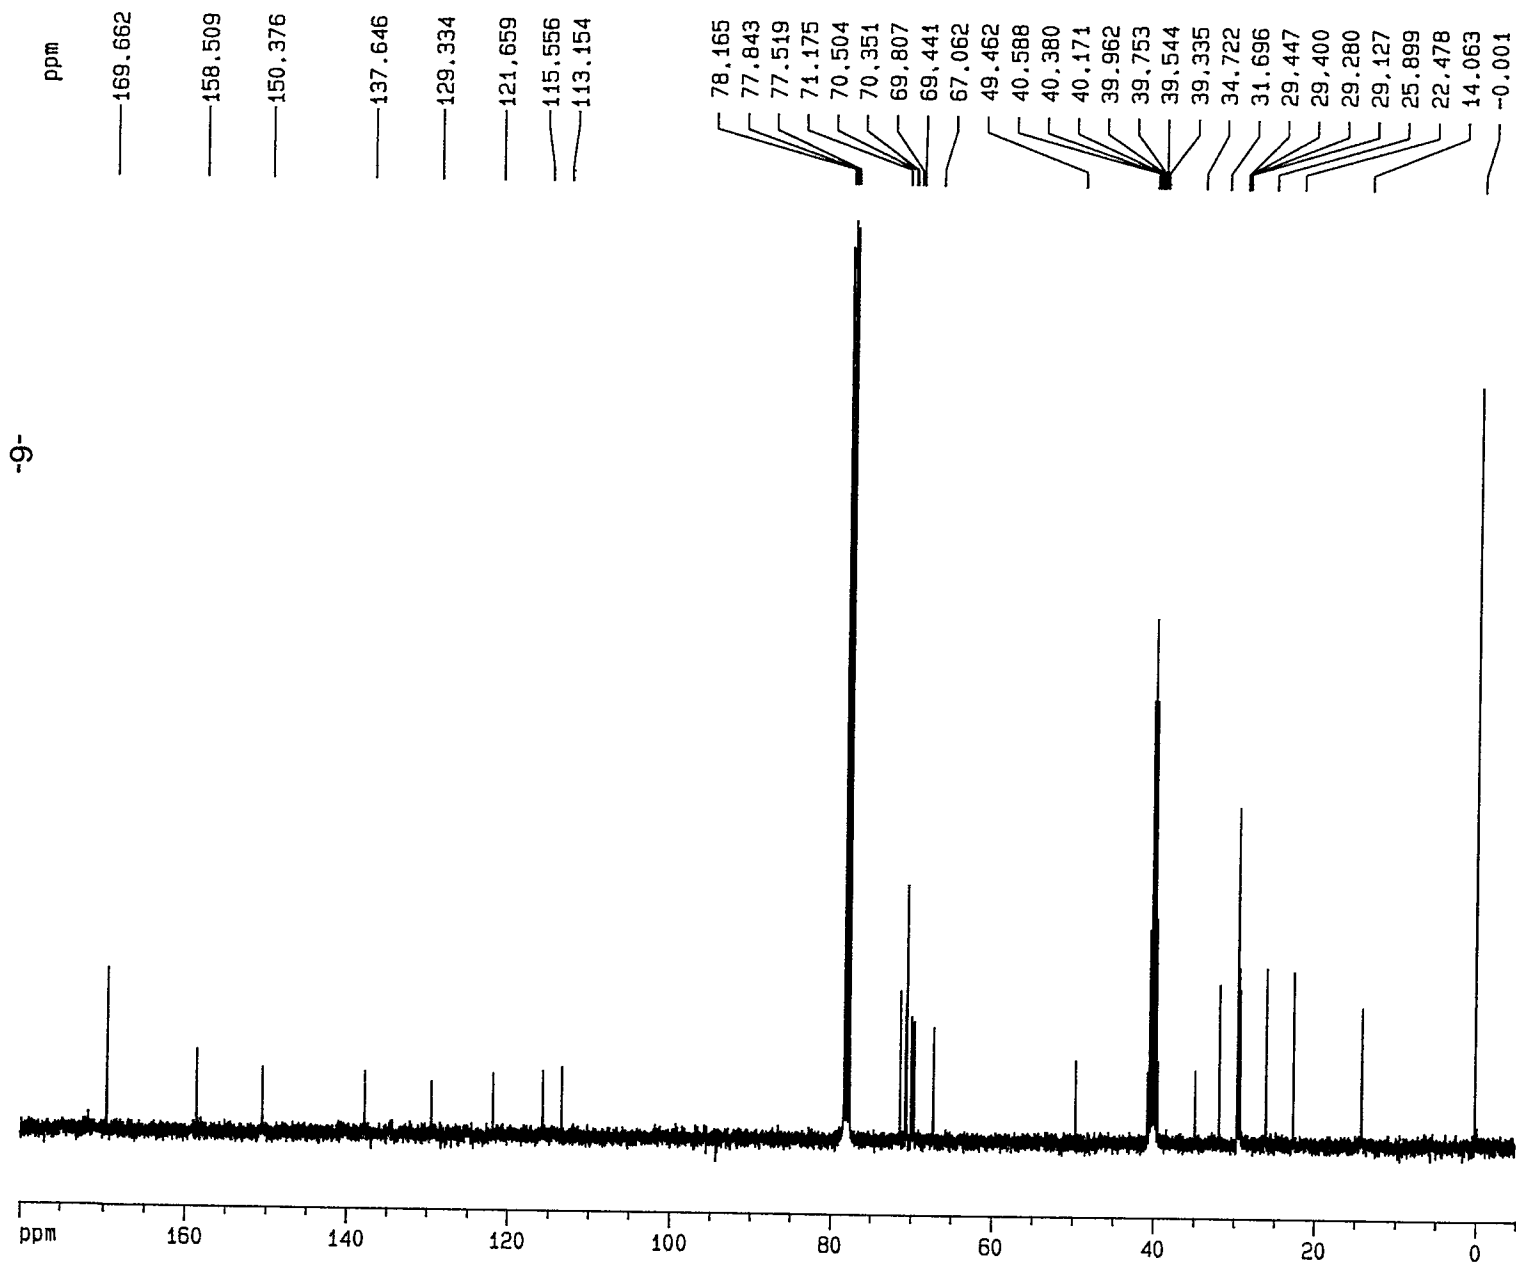

Current Data Parameters  
 NAME Hanam1-13C  
 EXPNO 980227  
 PROCNO 1

F2 - Acquisition Parameters  
 Date 980227  
 Time 8.13  
 PULPROG zg0dc  
 SOLVENT CDC13-DMSO-d6(4:1)  
 AQ 1.0485960 sec  
 FIDRES 0.476837 Hz  
 DW 16.0 usec  
 RG 45500  
 NUCLEUS 13C  
 D12 0.0000200 sec  
 DL5 15.00 dB  
 P31 100.0 usec  
 D1 3.0000000 sec  
 P0 3.5 usec  
 DE 22.9 usec  
 SF01 100.6480000 MHz  
 SWH 31250.00 Hz  
 TD 65536  
 NS 650  
 DS 2  
 D11 0.0300000 sec

F2 - Processing parameters  
 SI 32768  
 SF 100.6384051 MHz  
 WDW EM  
 SSB 0  
 LB 1.00 Hz  
 GB 0  
 PC 1.40

1D NMR plot parameters  
 CX 20.00 cm  
 F1P 180.000 ppm  
 F1 18114.91 Hz  
 F2P -5.000 ppm  
 F2 -503.19 Hz  
 PPMCM 9.25000 ppm/cm  
 HZCM 930.90527 Hz/cm

-2-

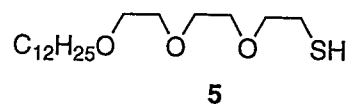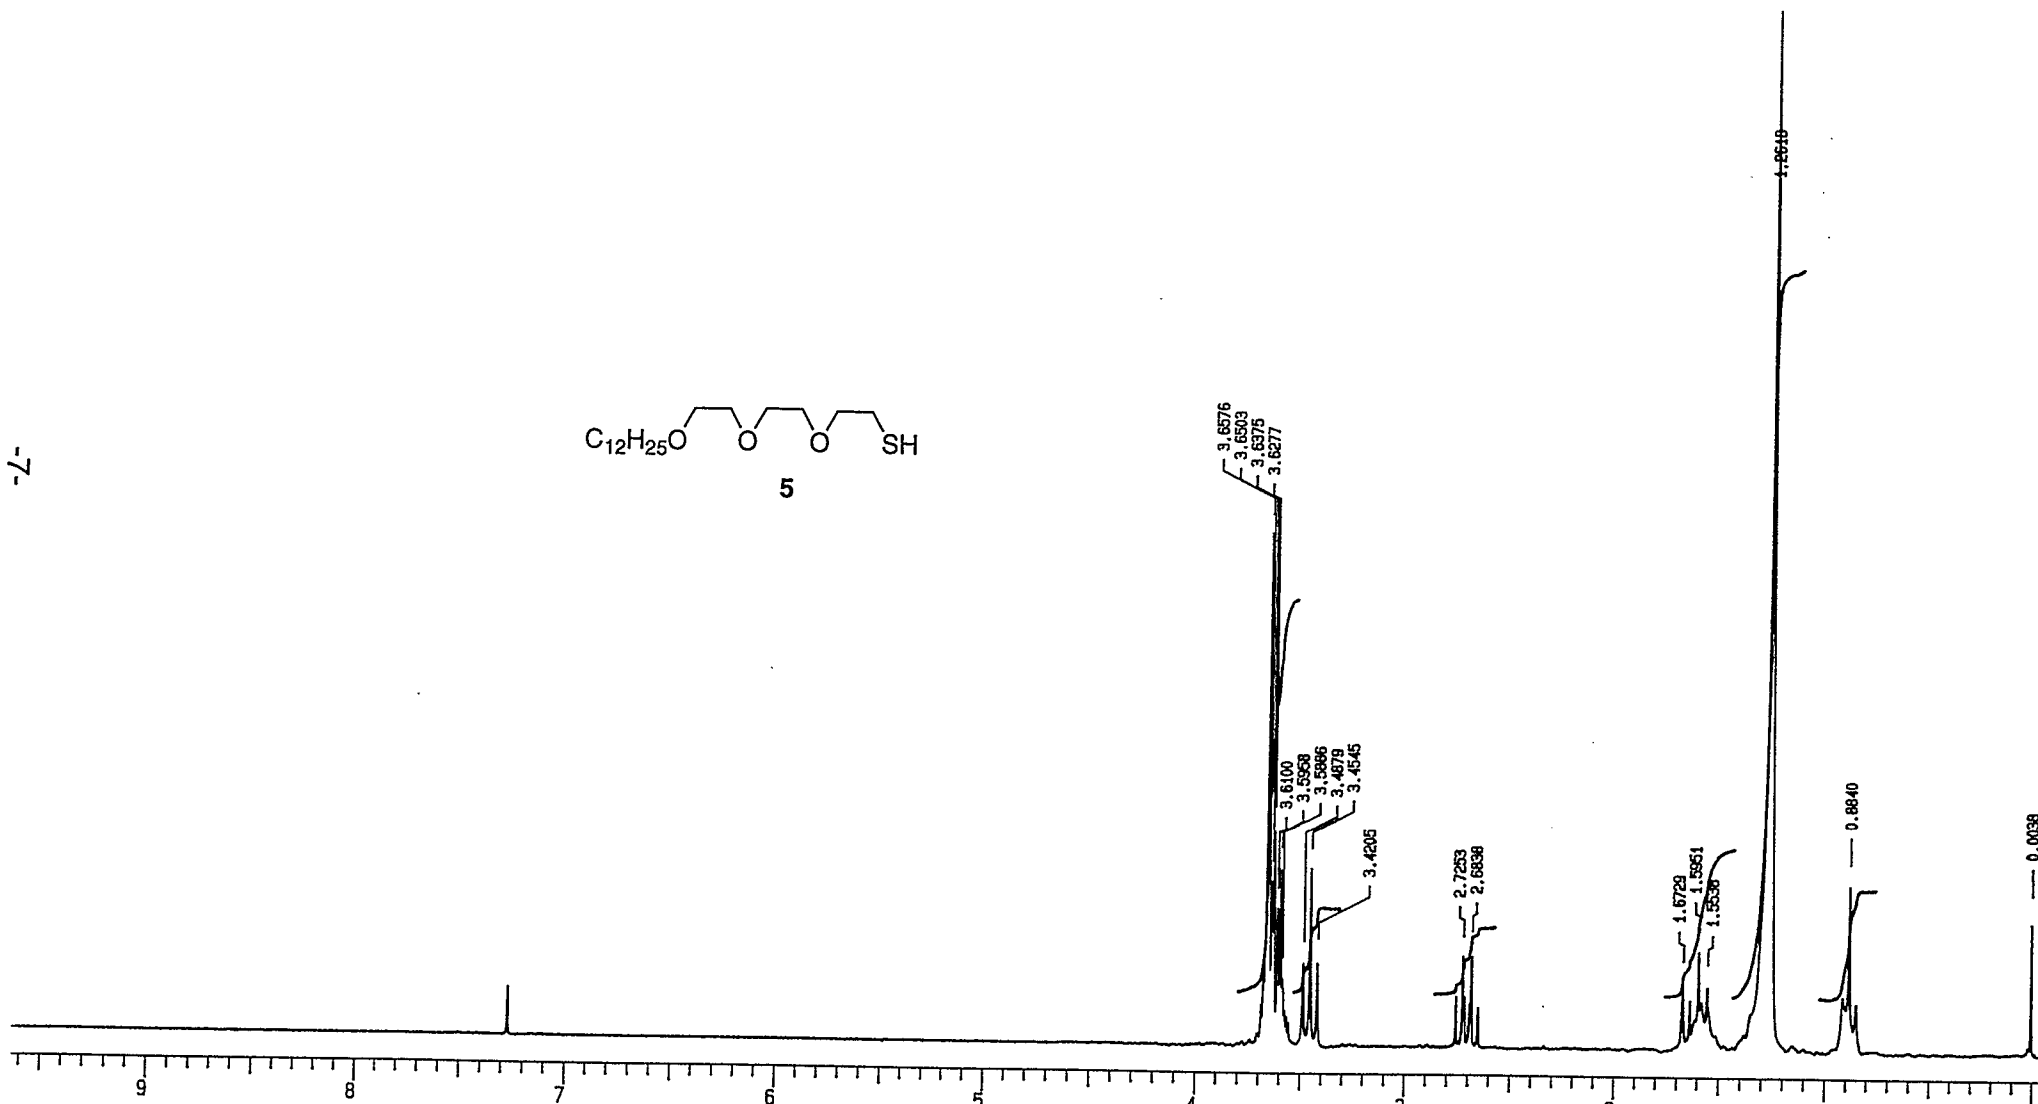

1.000  
3000.3  
2.666  
14.2

200  
0  
1.000  
24

1.000  
NNN  
C

-300.0  
1800.0  
200  
1.0

15  
—  
2000.0

-19.0

S2PUL  
—  
CDCl3

DOO-SH

H  
06-23-94  
00:05:48  
6EM 200



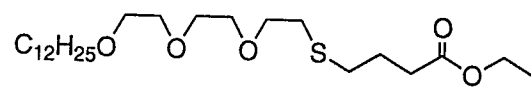

6

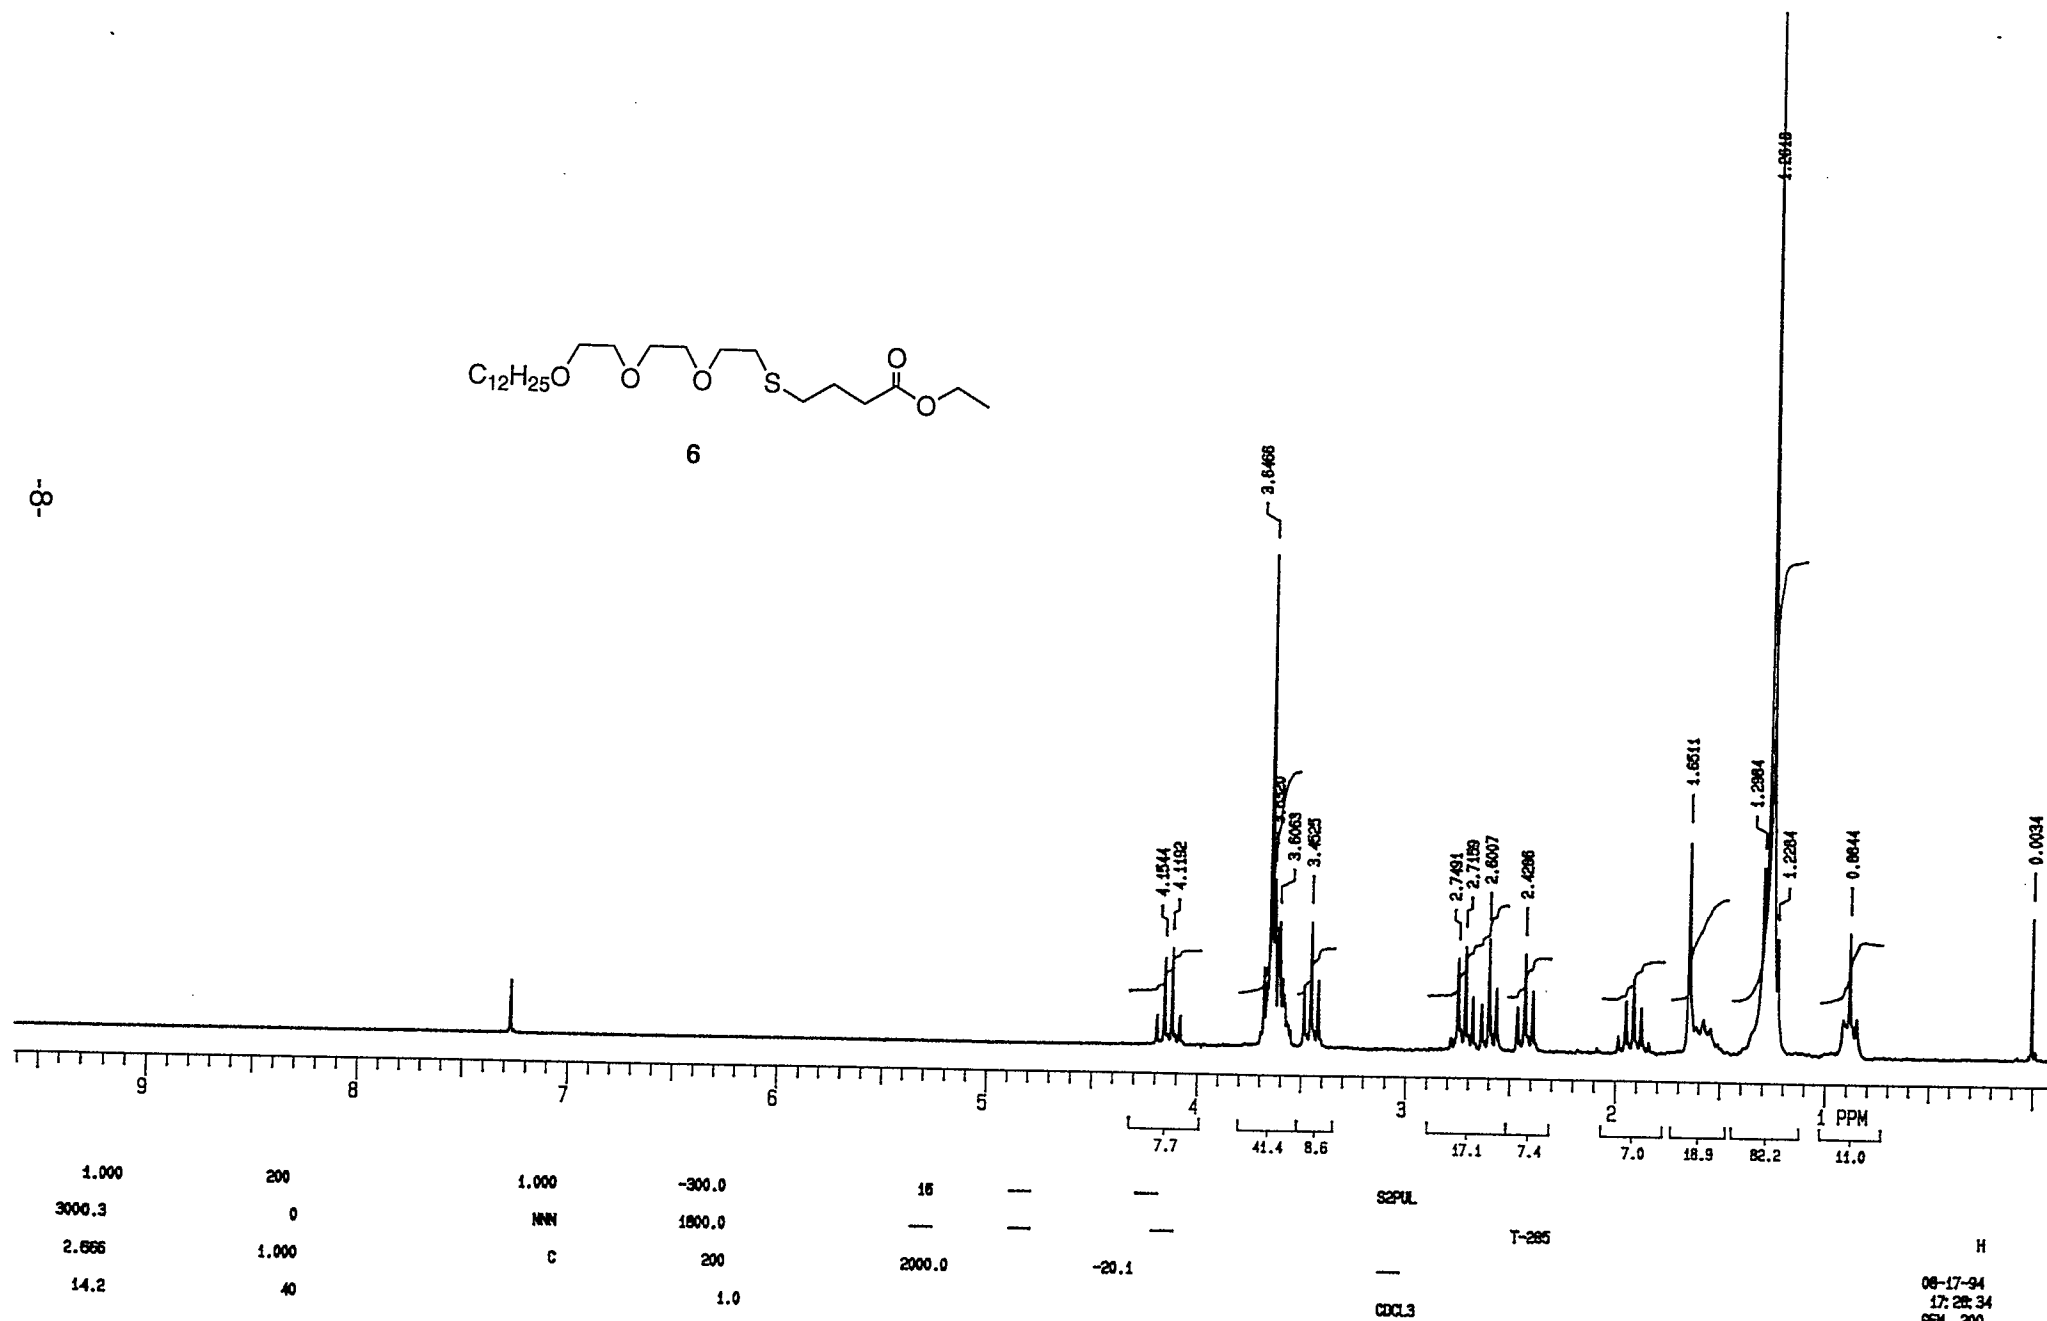

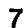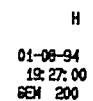

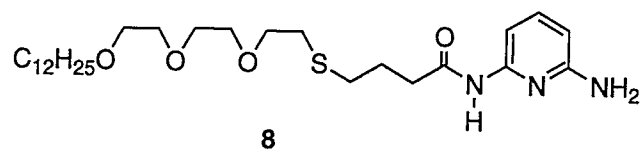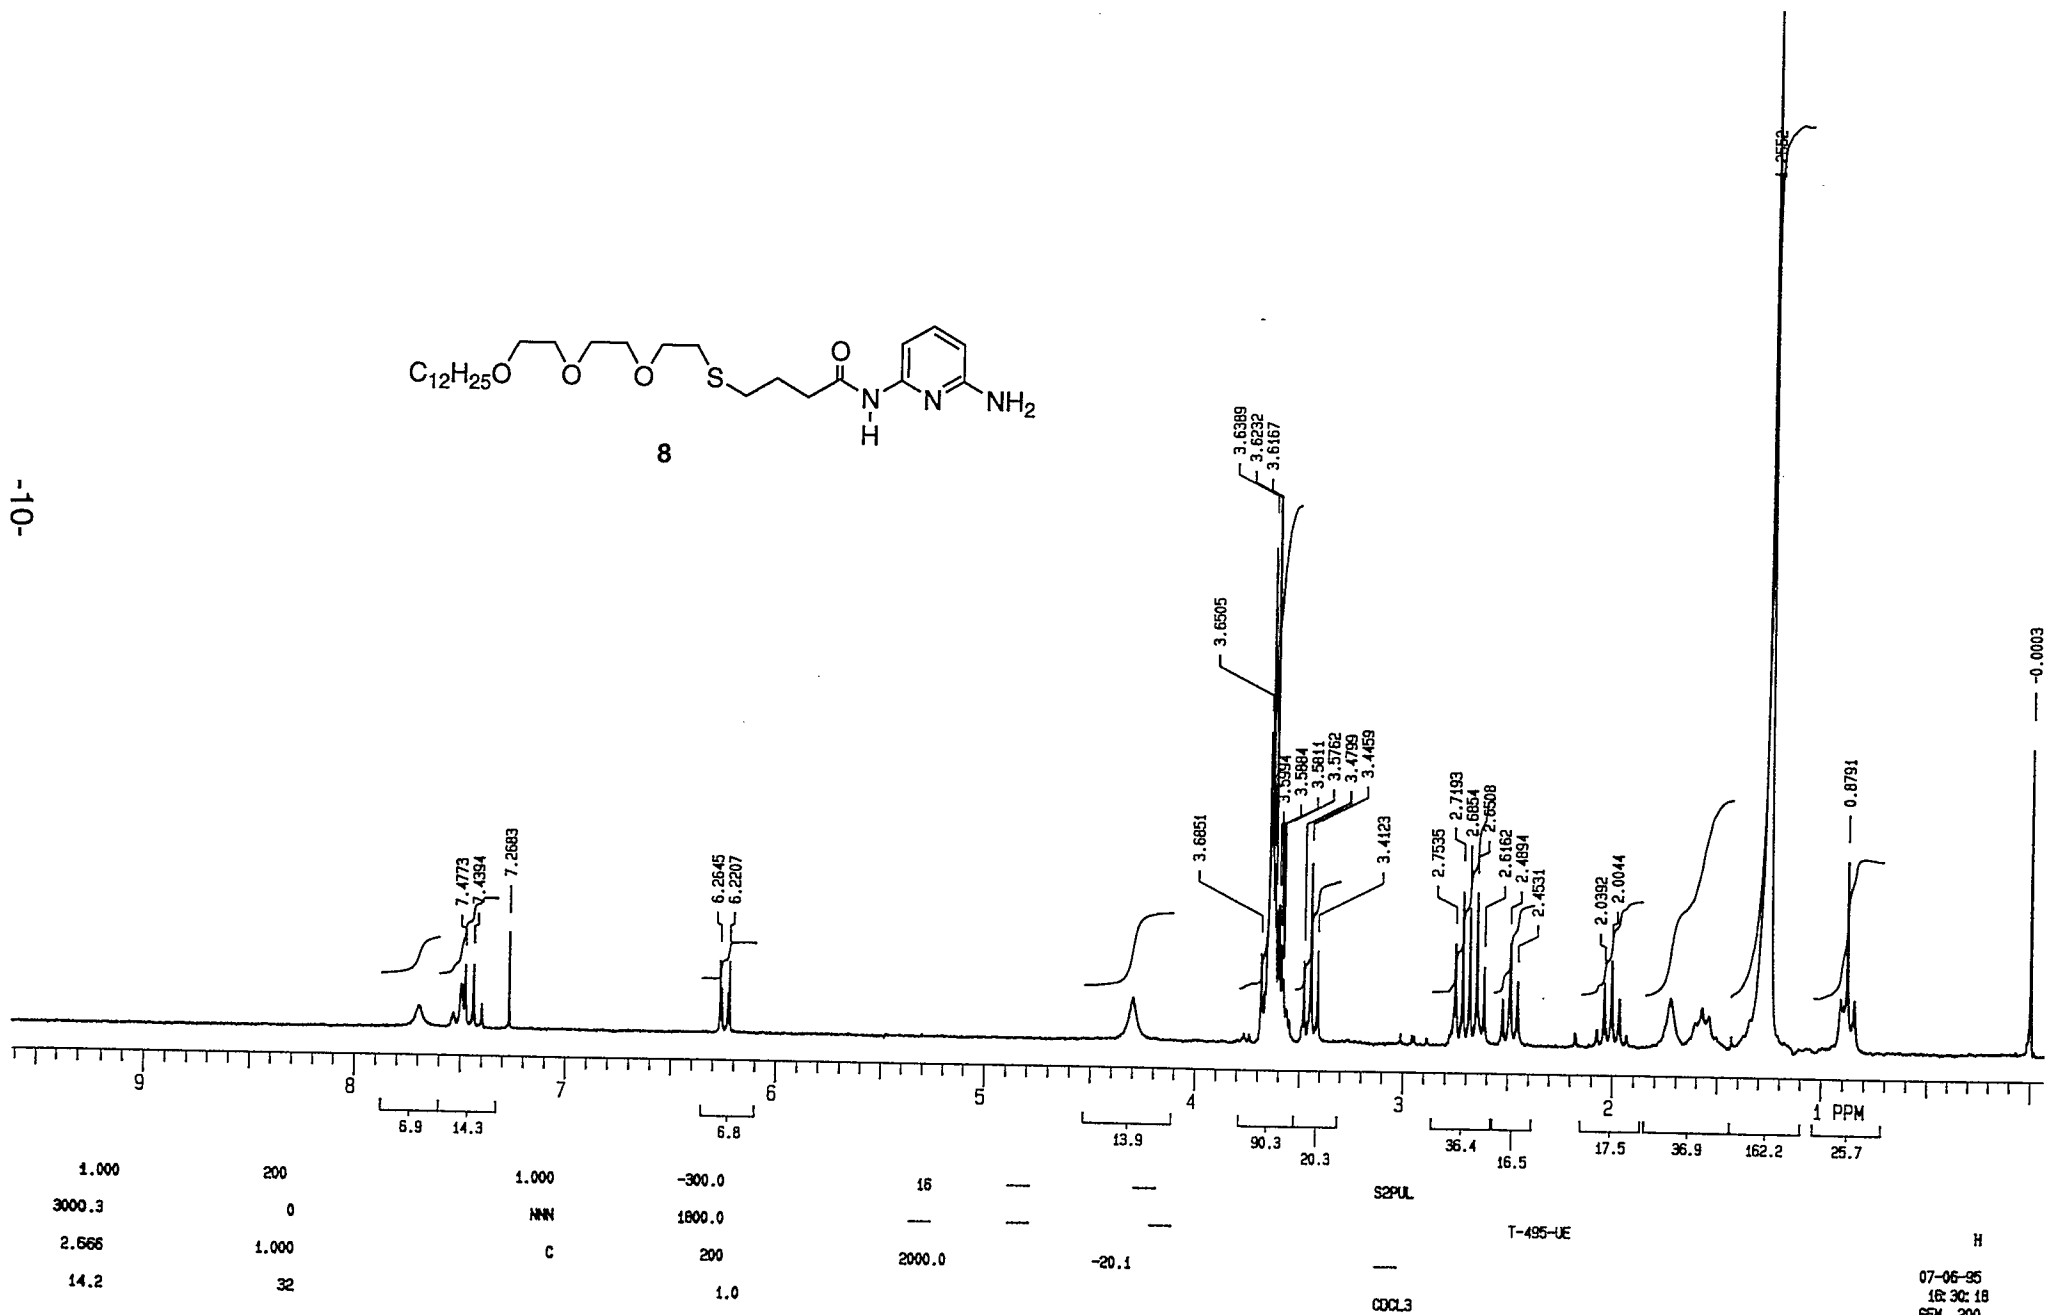

Isotope Patterns of Observed and Calculated ESIMS Spectra  
for a Mixture of **1**, **2** and  $\text{NaNO}_3$

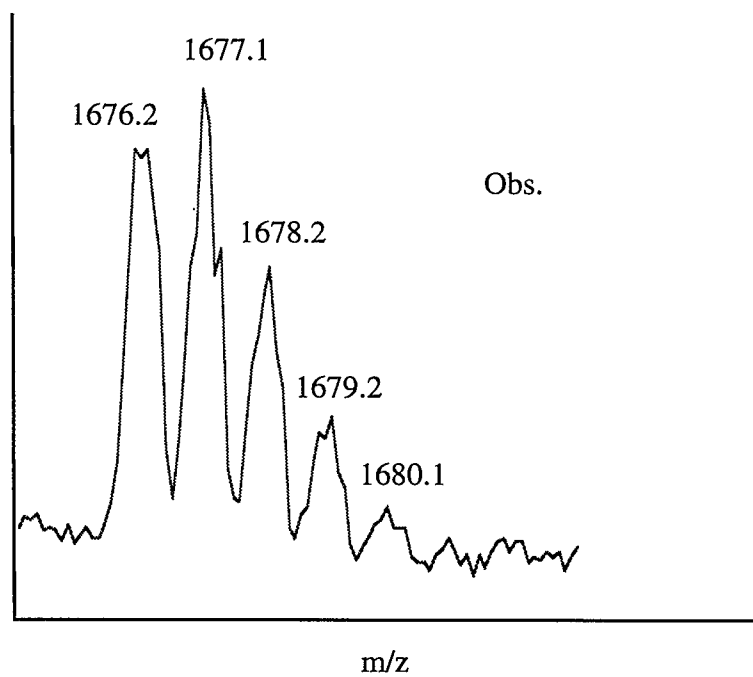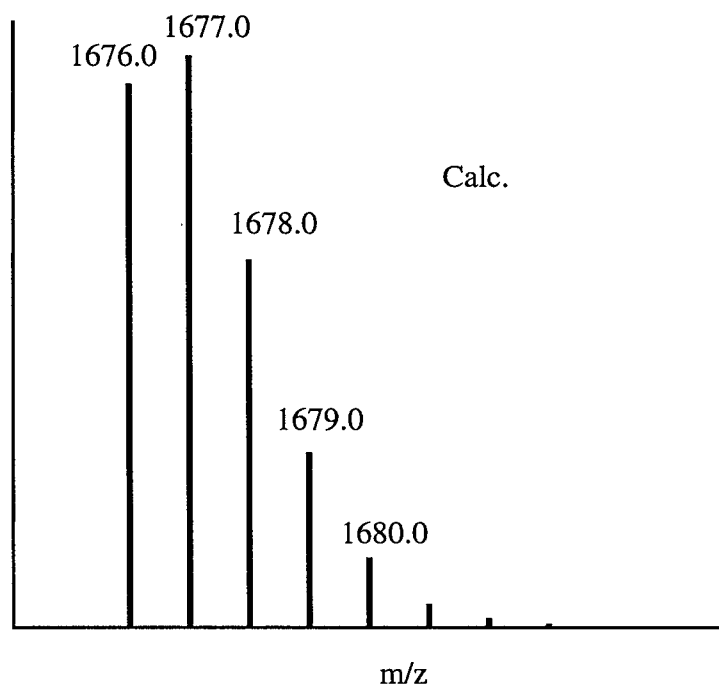

Supplement: Supplementary file 1 [file 5802477]
